# Supplementary material for: Flexible, silver containing nanocomposites for the repair of bone defects: antimicrobial effect against E. coli infection and comparison to tetracycline containing scaffolds
Source: Royal Society of Chemistry journal article supplement (doi:10.1039/b800522b), 2008-01-01
Supplement: b800522b.pdf [file b800522b.pdf]

Supporting Information for

**Flexible, silver containing nanocomposites for the repair of bone defects: Antimicrobial effect against *E. coli* infection and comparison to tetracycline containing scaffolds**

Oliver D. Schneider, Stefan Loher, Tobias J. Brunner, P. Schmidlin, Wendelin J. Stark\*

[\*] E-mail: wendelin.stark@chem.ethz.ch

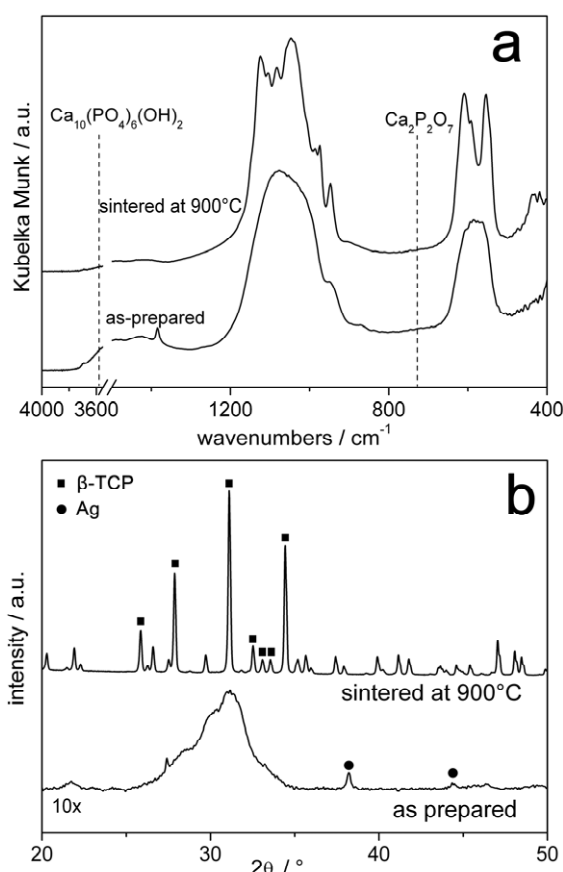

**Fig. S1.** Particle characterization of 5wt% Ag on TCP: (a) Fourier-transform infrared spectra of as-prepared nano-powder produced by flame synthesis and the distinct peaks characteristic for  $\beta$ -TCP after sintering. The absence of impurities of apatite ( $\sim 3600\text{ cm}^{-1}$ ) and calcium pyrophosphate ( $\sim 720\text{ cm}^{-1}$ ) confirm the purity of the material. (b) X-ray powder diffraction patterns for as-prepared XRD amorphous TCP and corresponding crystalline phase of  $\beta$ -TCP after sintering. The characteristic patterns of silver are overlapping with the sintered patterns for  $\beta$ -TCP.
